# Supplementary material for: Extraction, Enrichment, and Quantification of Main Antioxidant Aglycones of Flavonoids and Tannins from Melastoma Dodecandrum Lour.: Guided by UPLC-ESI-MS/MS
Source: Hindawi journal article supplement (doi:10.1155/2019/2793058), 2019-11-03
Supplement: f1 [file 2793058.f1.doc]

**Supplementary data**

Table S1. The tannins and flavonoids of *Melastoma dodecandrum* Lour. identified by UPLC-ESI-MS/MS in negative modes

| **Code** | **Rt**  **(min)** | **Molecular formula** | **[M-H]-(*m/z*)** | ***m/z* Error (ppm)** | **MS/MS (*m/z*)** | Identification |
| --- | --- | --- | --- | --- | --- | --- |
| A1 | 0.58 | C20H18O14 | 481.0659 | 8.52 | 300.9969、275.0219、257.0062、229.0173 | mono-O-ellagic glucoside |
| A2 | 0.621 | C27H22O18 | 633.0781 | 8.37 | 481.0659、331.0701、300.9969、275.0187、257.0128、169.0135、125.0254 | mono-O-ellagic-mono-O-galloyl glucoside |
| A3 | 0.744 | C7H6O5 | 169.0135 | -1.18 | 125.0254 | Gallic acid |
| A4 | 0.941 | C13H16O10 | 331.0663 | -0.6 | 271.0455、169.0135、125.0254 | mono-O-galloyl glucoside |
| A5 | 1.46 | C34H24O22 | 783.0743 | 7.92 | 481.0659、301.0004、275.0185、257.0062、229.0111 | Di-O-ellagic glucoside |
| A6 | 1.479 | C13H16O10 | 331.0663 | -0.6 | 169.0135、125.0231 | mono-O-galloyl glucoside |
| A7 | 2.636 | C27H22O18 | 633.0781 | 8.37 | 481.0659、331.0663、301.0004、275.0187、257.0128、249.0442、229.0111、169.0161、125.0254 | mono-O-ellagic-mono-O-galloyl glucoside |
| A8 | 3.006 | C34H24O22 | 783.0685 | 0.51 | 481.0615、301.0004、275.0185、257.0095、229.0142 | Di-O-ellagic glucoside |
| A9 | 3.132 | C20H20O14 | 483.0805 | 6.21 | 169.0161、125.0254 | Di-O-galloyl glucoside |
| A10 | 3.958 | C20H20O14 | 483.0805 | 6.21 | 169.0135、125.0254 | Di-O-galloyl glucoside |
| A11 | 5.042 | C20H20O14 | 483.0805 | 6.21 | 331.0663、313.0508、271.0455、169.0135、125.0254 | Di-O-galloyl glucoside |
| A12 | 5.14 | C48H32O30 | 1087.0911 | 1.01 | 785.0758、301.0004、275.0185、257.0095、249.0410、229.0142 | Tri-O-ellagic glucoside |
| A13 | 5.275 | C27H22O18 | 633.0729 | 0.16 | 481.0659、331.0663、301.0004、275.0185、257.0128、249.0410、229.0173、169.0135、125.0254 | mono-O-ellagic-mono-O-galloyl glucoside |
| A14 | 5.543 | C41H28O26 | 935.0792 | 0.11 | 783.0685、633.0781、301.0004、275.0219、249.0410、169.0135、125.0254 | Di-O-ellagic-mono-O-galloyl glucoside |
| A15 | 5.548 | C41H30O26 | 937.0906 | -4.38 | 785.0701、633.0781、481.0659、301.0004、275.0219、249.0410、229.0142、169.0135、125.0254 | mono-O-ellagic-tri-O-galloyl glucoside |

Table S1. The tannins and flavonoids of *Melastoma dodecandrum* Lour. identified by UPLC-ESI-MS/MS in negative modes (Continued)

| **Code** | **Rt**  **(min)** | **Molecular formula** | **[M-H]-(*m/z*)** | ***m/z* Error (ppm)** | **MS/MS (*m/z*)** | Identification |
| --- | --- | --- | --- | --- | --- | --- |
| A16 | 5.884 | C41H30O26 | 937.0906 | -4.38 | 785.0758、633.0729、481.0659、301.0004、329.0301、275.0219、249.0410、229.0142、169.0135、125.0254 | mono-O-ellagic-tri-O-galloyl glucoside |
| A17 | 5.905 | C41H28O26 | 935.0792 | 0.11 | 783.0685、633.0781、481.0615、301.0004、275.0219、249.0410、169.0135、125.0254 | Di-O-ellagic-mono-O-galloyl glucoside |
| A18 | 6.317 | C41H30O27 | 953.0897 | 0.1 | 633.0677、300.9969、275.0185、249.0410、229.0142、169.0135 | chebulagic acid |
| A19 | 7.755 | C20H20O13 | 467.0817 | -1.93 | 423.0911、315.0724、169.0135 | Acertannin |
| A20 | 8.647 | C27H24O18 | 635.0894 | 1.57 | 169.0161、125.0254 | Tri-O-galloyl glucoside |
| A21 | 9.035 | C34H26O22 | 785.0873 | 4.59 | 633.0729、483.0760、331.0663、301.0004、275.0185、249.0377、257.0062、169.0135、125.0254 | mono-O-ellagic-di-O-galloyl glucoside |
| A22 | 9.127 | C48H32O30 | 1087.0911 | 1.01 | 785.0873、483.0760、300.9969、275.0185、257.0062、249.0410、229.0111 | Tri-O-ellagic glucoside |
| A23 | 9.552 | C41H30O26 | 937.0906 | -4.38 | 785.0873、633.0729、481.0615、301.0004、275.0185、229.0142、169.0135、125.0254 | mono-O-ellagic-tri-O-galloyl glucoside |
| A24 | 9.589 | C41H28O26 | 935.0792 | 0.11 | 633.0781、481.0615、301.0004、275.0185、249.0410、169.0135、125.0254 | Di-O-ellagic-mono-O-galloyl glucoside |
| A25 | 9.665 | C34H26O22 | 785.0873 | 4.59 | 633.0729、483.0805、331.0663、300.9969、275.0185、249.0410、229.0142、169.0135、125.0231 | mono-O-ellagic-di-O-galloyl glucoside |
| A26 | 10.455 | C34H26O22 | 785.0815 | -2.8 | 633.0729、483.0760、313.0580、300.9969、275.0185、249.0410、229.0111、169.0135、125.0254 | mono-O-ellagic-di-O-galloyl glucoside |
| A27 | 10.68 | C48H32O30 | 1087.0979 | 7.27 | 785.0873、300.9969、275.0185、257.0062、249.0377、229.0111 | Tri-O-ellagic glucoside |

Table S1. The tannins and flavonoids of *Melastoma dodecandrum* Lour. identified by UPLC-ESI-MS/MS in negative modes(Continued)

| **Code** | **Rt**  **(min)** | **Molecular formula** | **[M-H]-(*m/z*)** | ***m/z* Error (ppm)** | **MS/MS (*m/z*)** | Identification |
| --- | --- | --- | --- | --- | --- | --- |
| A28 | 10.735 | C27H24O18 | 635.0894 | 1.57 | 483.0760、313.0544、169.0135、125.0254 | Tri-O-galloyl glucoside |
| A29 | 11.02 | C48H32O30 | 1087.0911 | 1.01 | 785.0758、483.0625、300.9969、275.0185、257.0062、249.0377、229.0111 | Tri-O-ellagic glucoside |
| A30 | 11.35 | C14H6O8 | 301.0004 | 6.64 | 283.0616、275.0185、257.0128、249.0377、229.0111 | Ellagic acid |
| A31 | 11.913 | C28H24O16 | 615.0989 | 0.49 | 463.0888、169.0135 | 2""-O-Galloylhyperin |
| A32 | 12.103 | C34H26O22 | 785.0815 | -2.8 | 633.0729、483.00805、313.0544、300.9969、275.0185、249.0377、229.0173、169.0135、125.0254 | mono-O-ellagic-di-O-galloyl glucoside |
| A33 | 13.695 | C34H28O22 | 787.0972 | -2.8 | 313、169.0135、125.0254 | Tetra-O-galloyl glucoside |
| A34 | 14.372 | C41H28O26 | 935.0729 | -6.63 | 783.0685、633.0792、331.0663、300.9969、275.0185、169.0135、125.0254 | Di-O-ellagic-mono-O-galloyl glucoside |
| A35 | 14.388 | C48H32O30 | 1087.0911 | 1.01 | 785.0758、483.0805、300.9969、275.0185、257.0095、249.0377、229.0111 | Tri-O-ellagic glucoside |
| A36 | 14.65 | C41H28O26 | 935.0792 | 0.11 | 633.0792、481.0659、313.0580、300.9969、275.0185、169.0135、125.0254 | Di-O-ellagic-mono-O-galloyl glucoside |
| A37 | 14.852 | C41H30O26 | 937.0969 | 2.35 | 785.0815、635.0894、300.9969、275.0185、169.0135、125.0254 | Mono-O-ellagic-tri-O-galloyl glucoside |
| A38 | 15.941 | C41H32O26 | 939.1106 | 0.21 | 787.1029、169.0135、125.0254 | Penta-O-galloyl glucoside |
| A39 | 17.744 | C48H34O30 | 1089.1112 | 5.05 | 937.0969、635.0894、431.0992、301.0004、275.0219、169.0135、125.0254 | Di-O-ellagic-di-O-galloyl glucoside |

Table S1. The tannins and flavonoids of *Melastoma dodecandrum* Lour. identified by UPLC-ESI-MS/MS in negative modes(Continued)

| **Code** | **Rt**  **(min)** | **Molecular formula** | **[M-H]-(*m/z*)** | ***m/z* Error (ppm)** | **MS/MS (*m/z*)** | Identification |
| --- | --- | --- | --- | --- | --- | --- |
| **flavonoids** | | | | | | |
| B1 | 10.946 | C21H20O11 | 447.0938 | 2.46 | 357.0621、327.0502、285.0396、241.0485、133.0275 | Luteolin-C-glucoside isomer |
| B2 | 11.008 | C21H20O11 | 447.0938 | 2.46 | 357.0621、327.0502、285.0396、151.0019 | Kaempferol-C-glucoside isomer |
| B3 | 11.919 | C21H20O10 | 431.0992 | 3.25 | 341.0645、311.0536 | Apigenin-C-glucoside isomer |
| B4 | 11.936 | C21H22O10 | 433.113 | -1.15 | 271.0590、151.0040 | Naringenin-O-glucoside isomer |
| B5 | 12.268 | C27H30O16 | 609.1448 | -1.31 | 463.0888、301.0359、300.0276 | Quercetin-O-glucoside isomer |
| B6 | 12.373 | C21H20O10 | 431.0992 | 3.25 | 341.0683、311.0536、283.0616、269.0463、151.0019 | Vitexin |
| B7 | 12.929 | C21H20O10 | 431.0992 | 3.25 | 341.0683、311.0536、283.0616、269.0463、151.0044 | Isoflavin |
| B8 | 13.126 | C27H30O16 | 609.1448 | -1.31 | 300.0276、301.0359 | Quercetin-O-glucoside isomer |
| B9 | 13.54 | C21H20O11 | 447.0938 | 2.46 | 285.0396、255.0301、211.0211 | Kaempferol-O-glucoside isomer |
| B10 | 13.916 | C27H30O15 | 593.1503 | -0.51 | 285.0396、284.0308 | Kaempferol-O-glucoside isomer |
| B11 | 14.14 | C21H20O11 | 447.0938 | 2.46 | 285.0396、284.0308、255.0268、227.0318 | Kaempferol-O-glucoside isomer |
| B12 | 15.219 | C21H20O11 | 447.0938 | 2.46 | 285.0396、284.0308、255.0268、227.0318、151.0019 | Kaempferol-O-glucoside isomer |
| B13 | 17.172 | C21H20O11 | 447.0938 | 2.46 | 285.0396、284.0308、151.0019、133.0298、 | Luteolin-O-glucoside isomer |
| B14 | 17.269 | C21H20O12 | 463.0888 | 2.38 | 301.0359 | Quercetin-O-glucoside isomer |
| B15 | 17.568 | C21H20O10 | 431.0992 | 3.25 | 285.0396、284.0308、255.0301、227.0349 | Kaempferol-O-glucoside isomer |
